# Supplementary material
Source: PubMed Central journal article supplement (PMC5713675)
Supplement: f-73-00695-sup1.pdf [file f-73-00695-sup1.pdf]

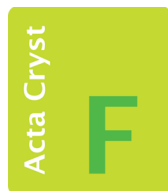

STRUCTURAL BIOLOGY  
COMMUNICATIONS

**Volume 73 (2017)**

**Supporting information for article:**

**Crystal structure of the second fibronectin type III (FN3)  
domain from human collagen  $\alpha 1$  type XX**

**Jingfeng Zhao, Jixia Ren, Nan Wang, Zhong Cheng, Runmei Yang, Gen  
Lin, Yi Guo, Dayong Cai, Yong Xie and Xiaohong Zhao**

**S1. Large-Scale Cell-Free Protein Synthesis Reaction protocol (Kigawa, 2010, Methods Mol Biol. 607,101-111.)**

(i). Prepare 9 mL of the reaction solution and 90 mL of the feeding solution at 277 K. The reaction solution contains 2 µg/mL template plasmid, 66.7 µg/mL T7 RNA polymerase, 30 % (v/v) S30 extract, 0.175 mg/mL tRNA, 1.5 mM each of 19 amino acids without L-tyrosine, 37.3 % (v/v) LMCPY mixture, 0.25 mg/mL creatine kinase, 10 mM magnesium acetate, and 0.05 % (w/v) sodium azide. The feeding solution contains 30 % (v/v) S30 buffer, 1.5 mM each of 19 amino acids without L-tyrosine, 37.3 % (v/v) LMCPY mixture, and 10 mM magnesium acetate.

To prepare 90 mL of the feeding solution, gently shake the tube containing the LMCPY mixture, to make it homogeneous. Combine the LMCPY mixture (33.6 mL), the amino acid mixture (6.75 mL), the magnesium acetate solution (0.522 mL), the S30 buffer (27 mL), and the sodium azide solution (0.9 mL). Bring the volume of the mixture solution to 90 mL with water. Place the mixture in a 100-mL centrifuge tube, and mix it thoroughly by turning the tube upside down gently several times.

To prepare 9 mL of the reaction solution, gently shake the tube containing the LMCPY mixture to make it homogeneous. Combine the LMCPY mixture (3.36 mL), the amino acid mixture (0.675 mL), the magnesium acetate solution (0.052 mL), the sodium azide solution (0.9 mL), and the tRNA solution (0.09 mL). To this solution, sequentially add the creatine kinase solution (0.6 mL), the T7 RNA polymerase solution (0.06 mL), and the plasmid DNA templates. Bring the volume of the mixture to 9 mL with water. Place the reaction solution in

a 50-mL centrifuge tube and mix it thoroughly by turning the tube upside down gently several times.

(ii) Place 90 mL of the feeding solution in a 400-mL square-shaped polystyrene case.

(iii) Seal one end of the dialysis tube (Spectra/Por 7, MWCO = 15,000) with a closure (Spectrum). Place the reaction solution (9 mL) in the dialysis tube, remove as much air from the tube as possible, and seal the open end of the tube with a closure.

(iv) Submerge the dialysis tube in the feeding solution in the polystyrene case. Wrap the case with plastic wrap.

(v) Shake the case reciprocally with one incubator shaker (50-mm amplitude, 50 rpm) at 373 K for 4 h.

(vi) Transfer the reaction solution to two fresh 50-mL centrifuge tubes. The reaction solution was centrifuged at 16,000 *g* at 277 K for 20 min. The supernatant loaded onto a HisTrap column (5 ml) for protein purification.

**Table S1** Macromolecule production information

|                                                        |                                                                                                                           |
|--------------------------------------------------------|---------------------------------------------------------------------------------------------------------------------------|
| Source organism                                        | <i>Homo sapiens</i>                                                                                                       |
| DNA source                                             | cDNA                                                                                                                      |
| Forward primer                                         | 5'-CCGAAC <u>CATATG</u> CAGGGCCCA GCAGC- 3' <sup>#</sup>                                                                  |
| Reverse primer                                         | 5'- <u>CGGATCC</u> TTAGGCCTGGTGACCA CAG-3' <sup>#</sup>                                                                   |
| Expression vector                                      | pEHISTEV                                                                                                                  |
| Expression host                                        | <i>E. coli</i> (codon-plus RIL strain) cell-free system                                                                   |
| Complete amino acid sequence of the construct produced | GAP <sup>T</sup> SLVLSQVTSSSIRLSWTPAPRHPLKYLIVWRA SRGGTPREVVV<br>EGPAASTELHNLASRTEYLVSVFPIYEGGVGEGRLRGLVTTAP <sup>S</sup> |

<sup>#</sup> *Nde*I restriction site and *Bam*HI restriction site are underlined. The stop codons are shown in italics.

<sup>S</sup> Additional residue after His-tag cleavage with TEV protease is shown in italics.

**Table S2** Amino acid sequence identities between the converted structural domain of human collagen  $\alpha 1$ (XX) and that of chick collagen  $\alpha 1$ (XX).

| Domain | Amino acid residues |               | Sequence identities (%) |
|--------|---------------------|---------------|-------------------------|
|        | Human               | <i>Gallus</i> |                         |
| FN#1   | 32 - 103            | 30 - 102      | 74                      |
| VWFA   | 169 - 358           | 231 - 420     | 61                      |
| FN#2   | 378 - 456           | 447 - 526     | 54                      |
| FN#3   | 468 - 554           | 537 - 612     | 39                      |
| FN#4   | 559 - 644           | 627 - 702     | 49                      |
| FN#5   | 650 - 731           | 717 - 795     | 51                      |
| FN#6   | 742 - 826           | 810 - 888     | 42                      |
| Tsp    | 830 - 958           | 910 - 1154    | 64                      |
| Col 2  | 959 - 1192          | 1155 - 1309   | 60                      |
| NC2    | 1193 - 1231         | 1310-1355     | 61                      |
| Col 1  | 1232 - 1287         | 1356-1458     | 45                      |
| NC1    | Not conserved       | 1459-1473     | -                       |

**Table S3** Amino acid sequence identities (%) between any two FN3 domains from human collagen  $\alpha 1(\text{XX})$ .

|      | FN#1 | FN#2 | FN#3 | FN#4 | FN#5 |
|------|------|------|------|------|------|
| FN#2 | 18   |      |      |      |      |
| FN#3 | 26   | 39   |      |      |      |
| FN#4 | 45   | 35   | 30   |      |      |
| FN#5 | 26   | 29   | -*   | 28   |      |
| FN#6 | 36   | 33   | 35   | 28   | 38   |

\* No significant similarity between FN#3 and FN#5.
